# Supplementary material for: Inhibition of Uncoupling Protein 2 Enhances the Radiosensitivity of Cervical Cancer Cells by Promoting the Production of Reactive Oxygen Species
Source: Hindawi journal article supplement (doi:10.1155/2020/5135893), 2020-03-04
Supplement: f1 [file 5135893.f1.pdf]

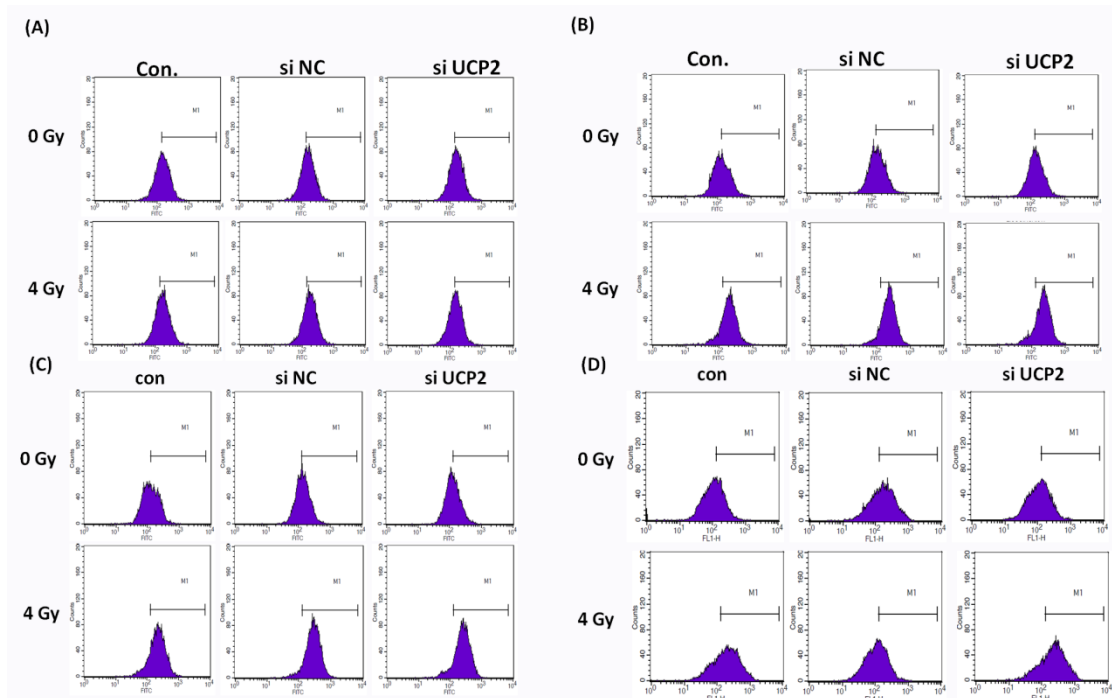

S1. Flow diagram of Alteration of mitochondrial membrane potential

(A,B,C,D)Alteration of mitochondrial membrane potential after irradiation in 6h,8h,12h,24h
